# Supplementary material
Source: PubMed Central journal article supplement (PMC3476626)
Supplement: tjp0590-3665-SD2.pdf [file tjp0590-3665-SD2.pdf]

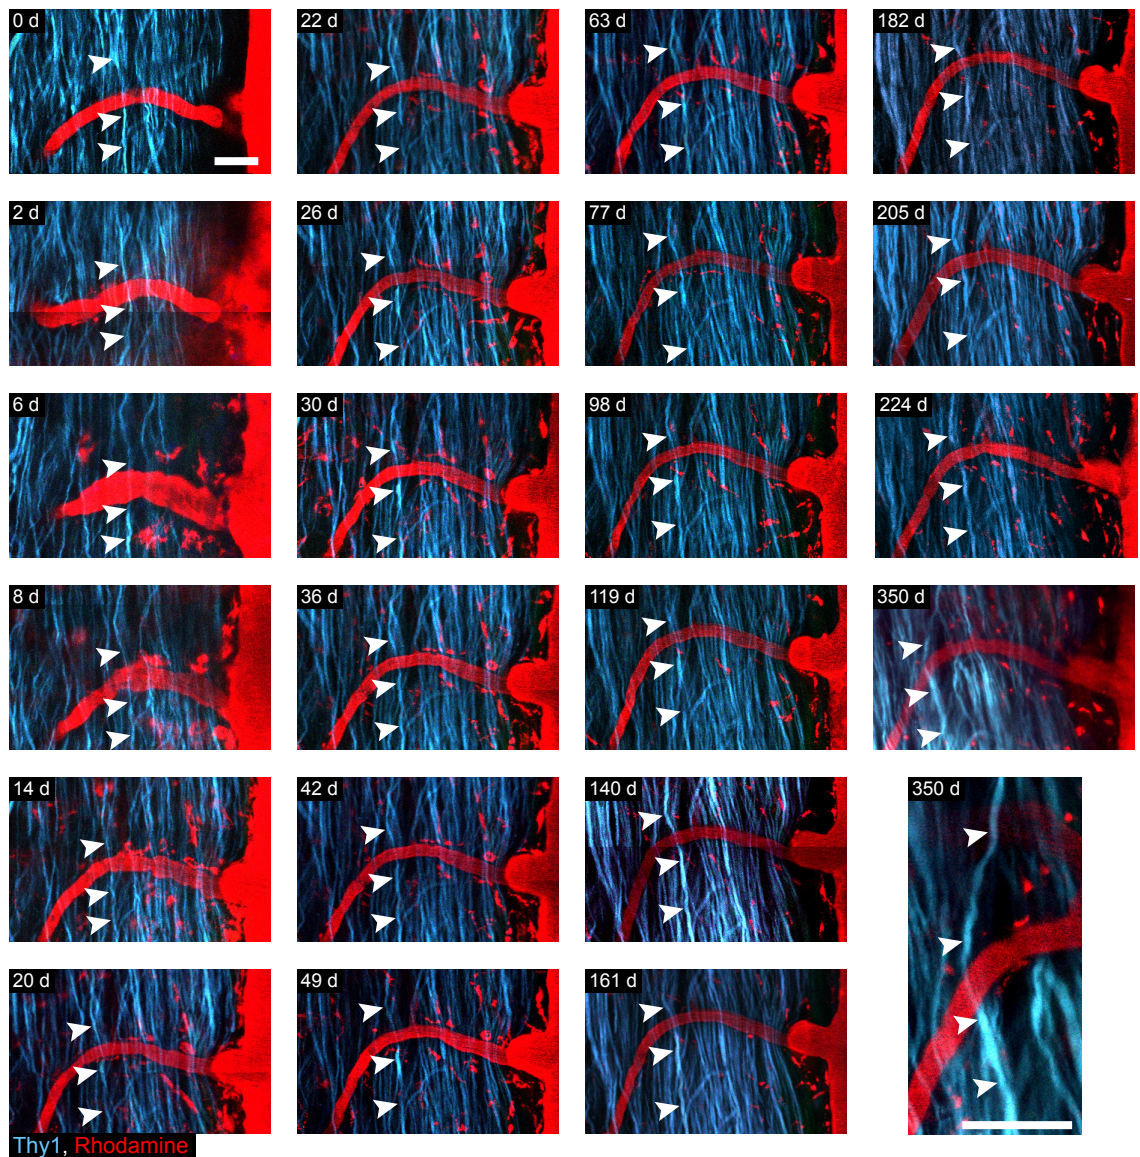

Supplementary Figure 2

Imaging of the same spinal regions for extended periods of time. Images showing axons and blood vessels from the same spinal region from 0 days to 350 days after window implantation (n = 22 imaging sessions). The same axon (arrowheads) was identified at each subsequent post-implantation interval by scrolling through 3D image stacks, and using vascular and axon landmarks from the previous imaging sessions. Inset on bottom right shows high power view of identified axon at 350 days post-implantation. Caudal is up; Rostral is down. Scale bar, 50  $\mu$ m.
