# Supplementary material
Source: PubMed Central journal article supplement (PMC3476626)
Supplement: tjp0590-3665-SD3.pdf [file tjp0590-3665-SD3.pdf]

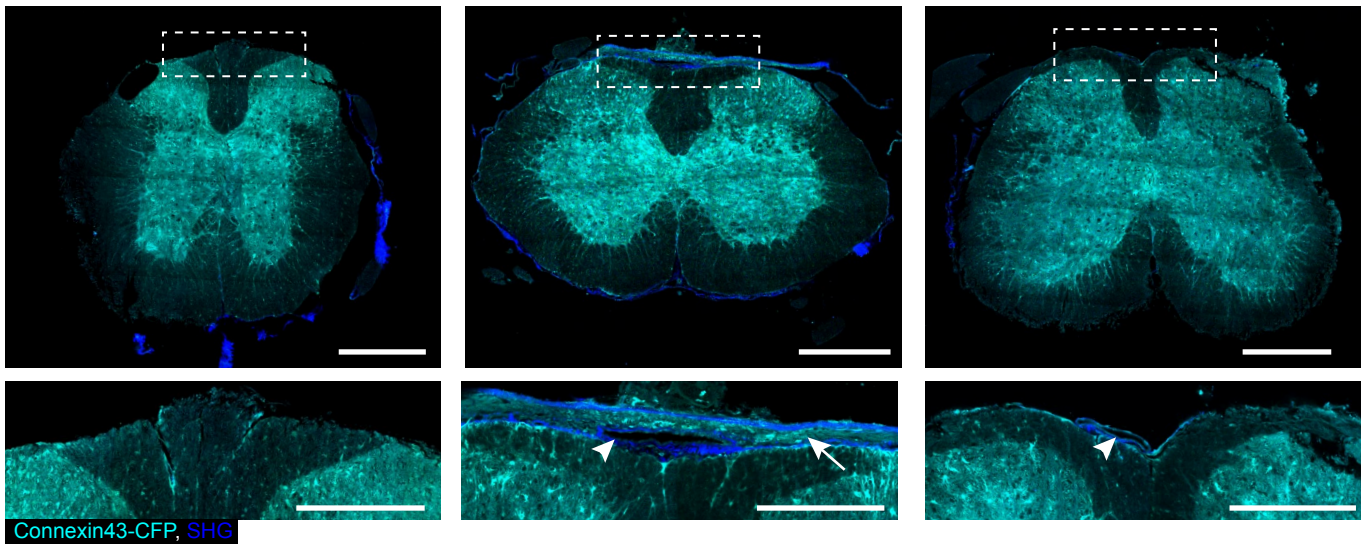

### Supplementary Figure 3

Connexin-43 distribution in spinal cord after window implantation. Images of fixed spinal sections in transverse view showing Connexin-CFP labelled astrocytes at 5d post-implantation in a thoracic spinal segment rostral of the window (left), in a lumbar segment at the level of window implantation (center), and a sacral segment caudal of the window (right). Upper images show low power view of entire spinal cross-sections. Lower images (boxed regions in upper images) show the dorsal aspects of the spinal cord most likely to be affected by window implantation. Arrowheads point to the central vein. The arrow in the lower middle image indicates the thin layer of tissue that develops between the dura mater and the Kwik-sil (dark area surrounded by SHG) at the level of the window implantation. SHG signal highlights collagen structures. Dorsal is up; Ventral is down. Scale bars, 500  $\mu\text{m}$  upper images; 250  $\mu\text{m}$  lower images.
